# Supplementary material
Source: PubMed Central journal article supplement (PMC3620040)

Figure S1

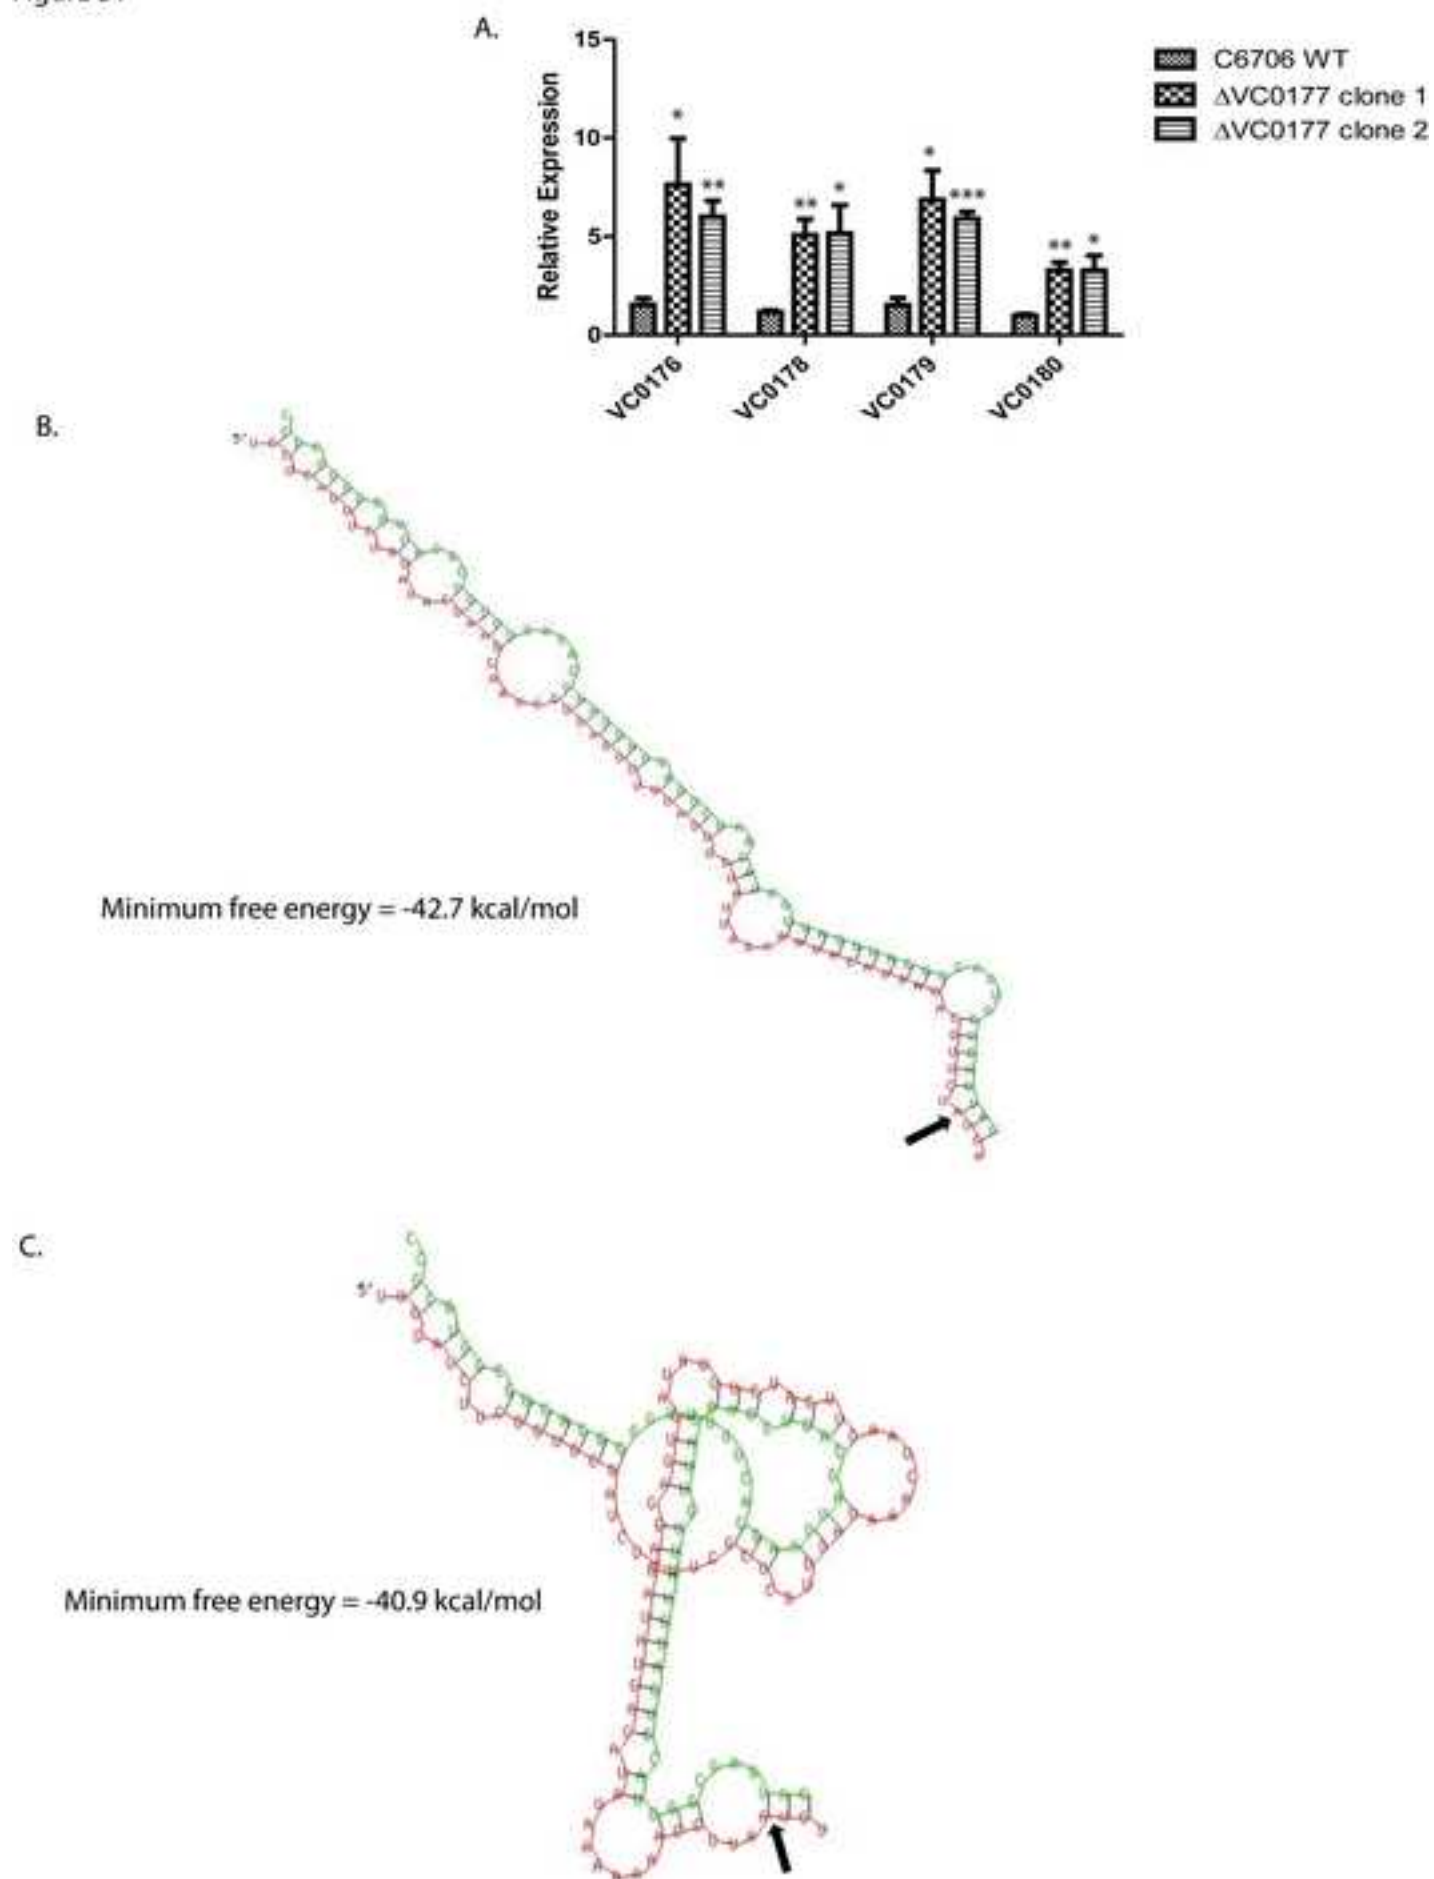



Figure S3

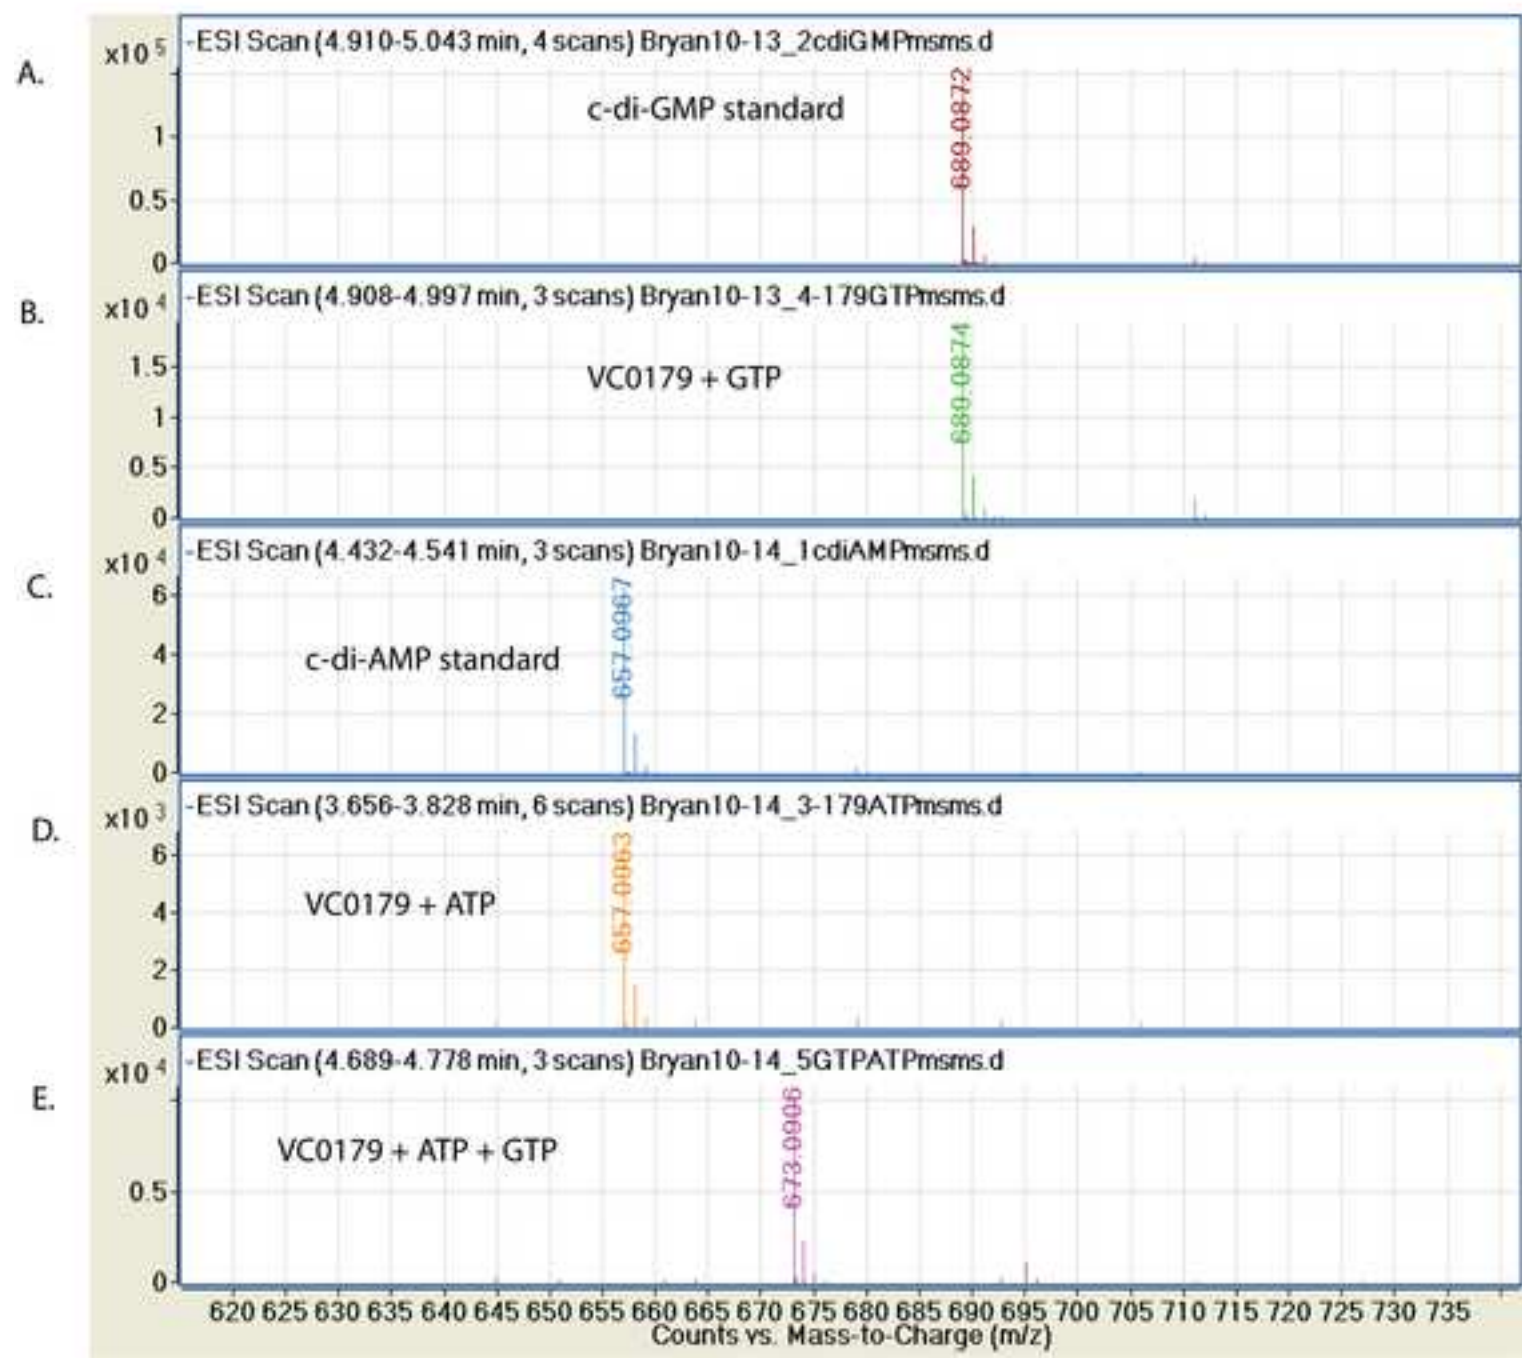



Figure S4

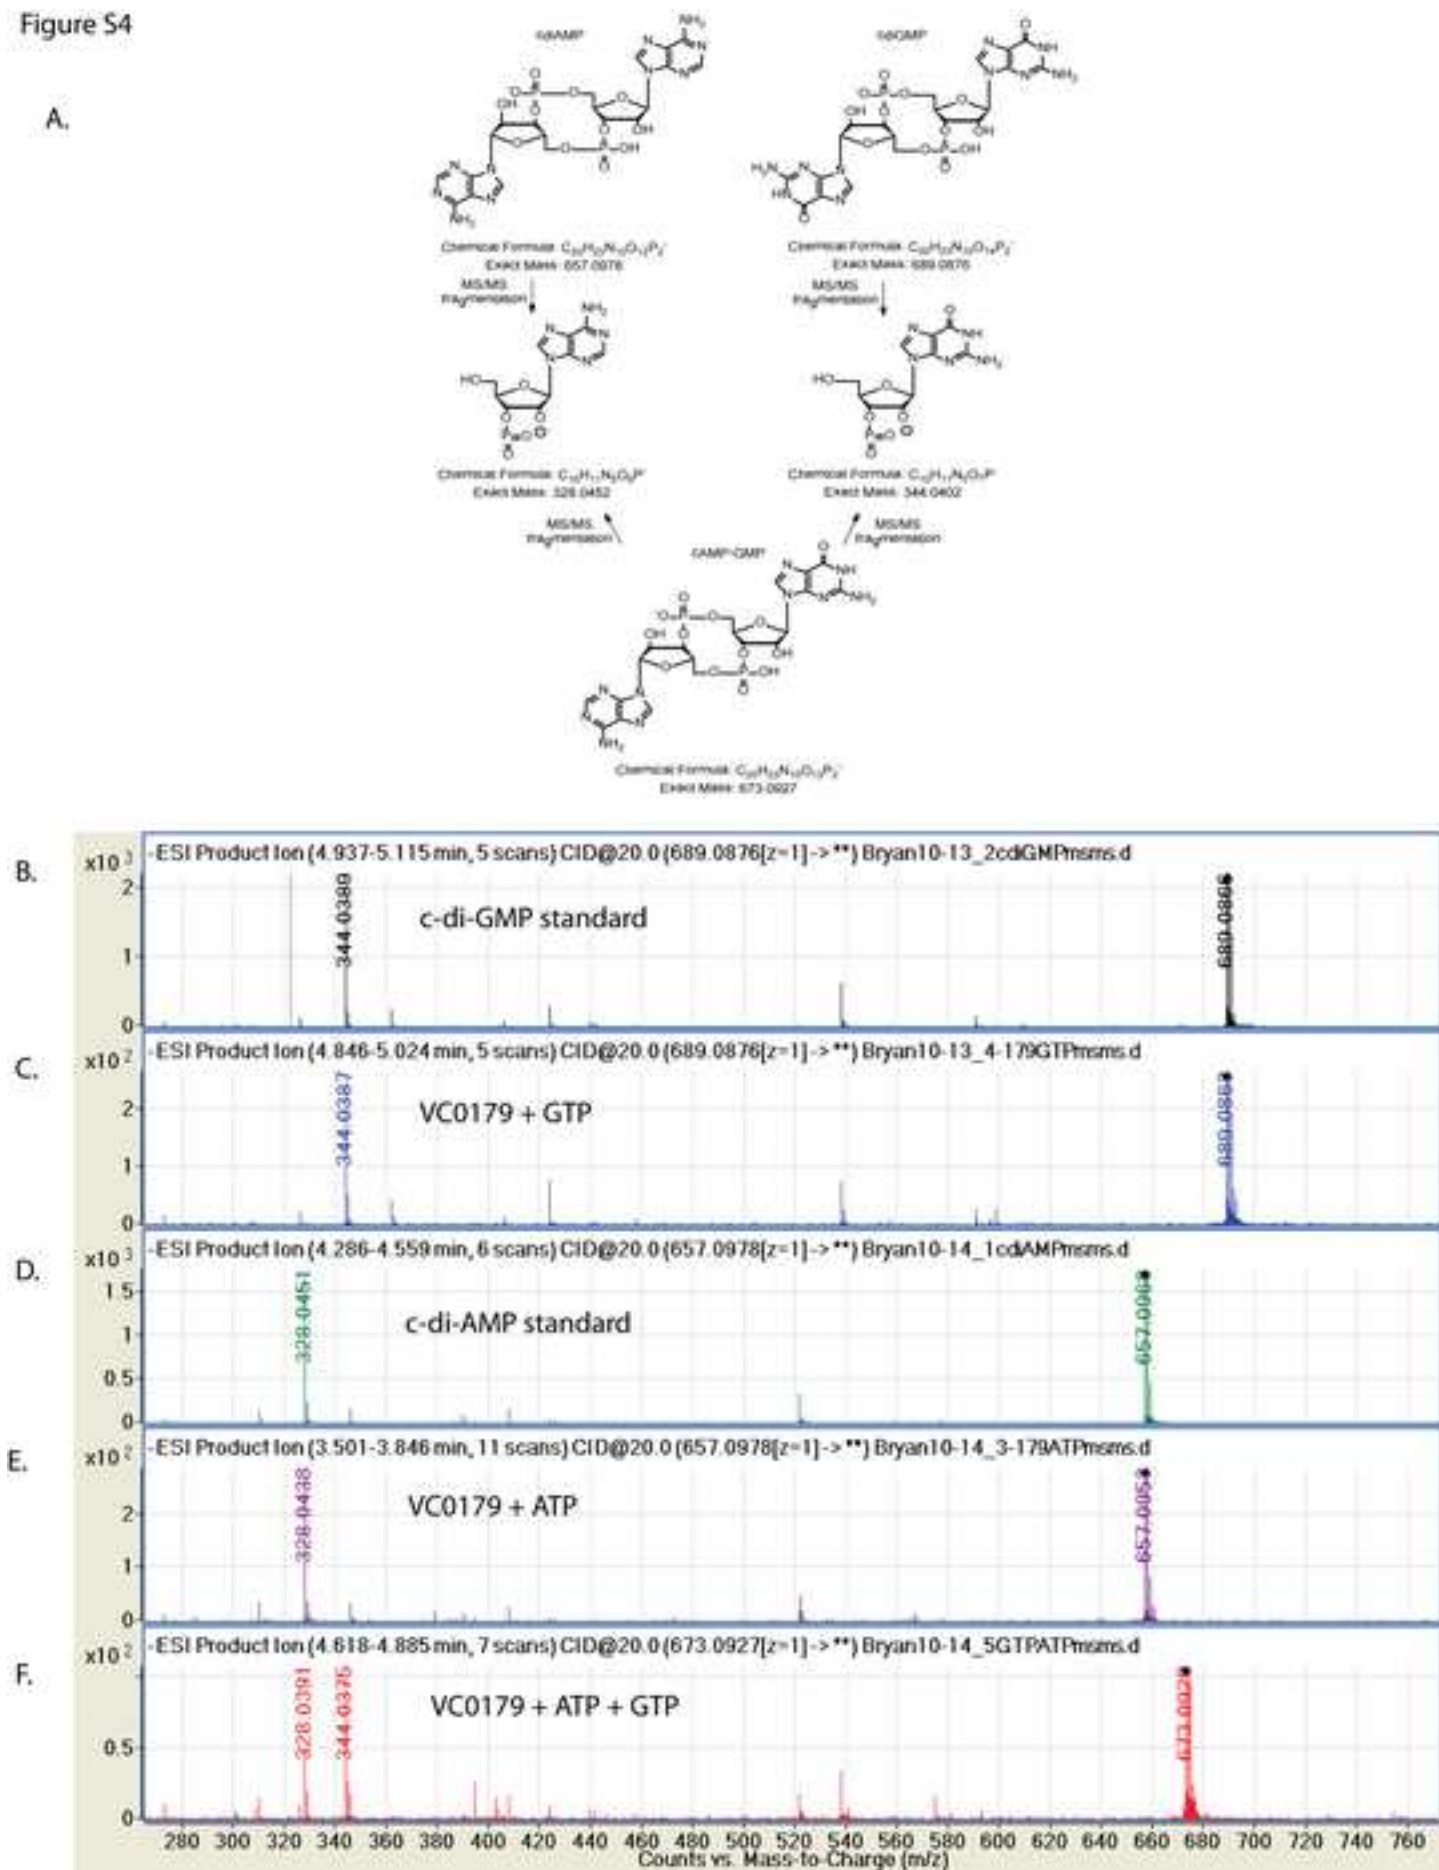

Figure S5

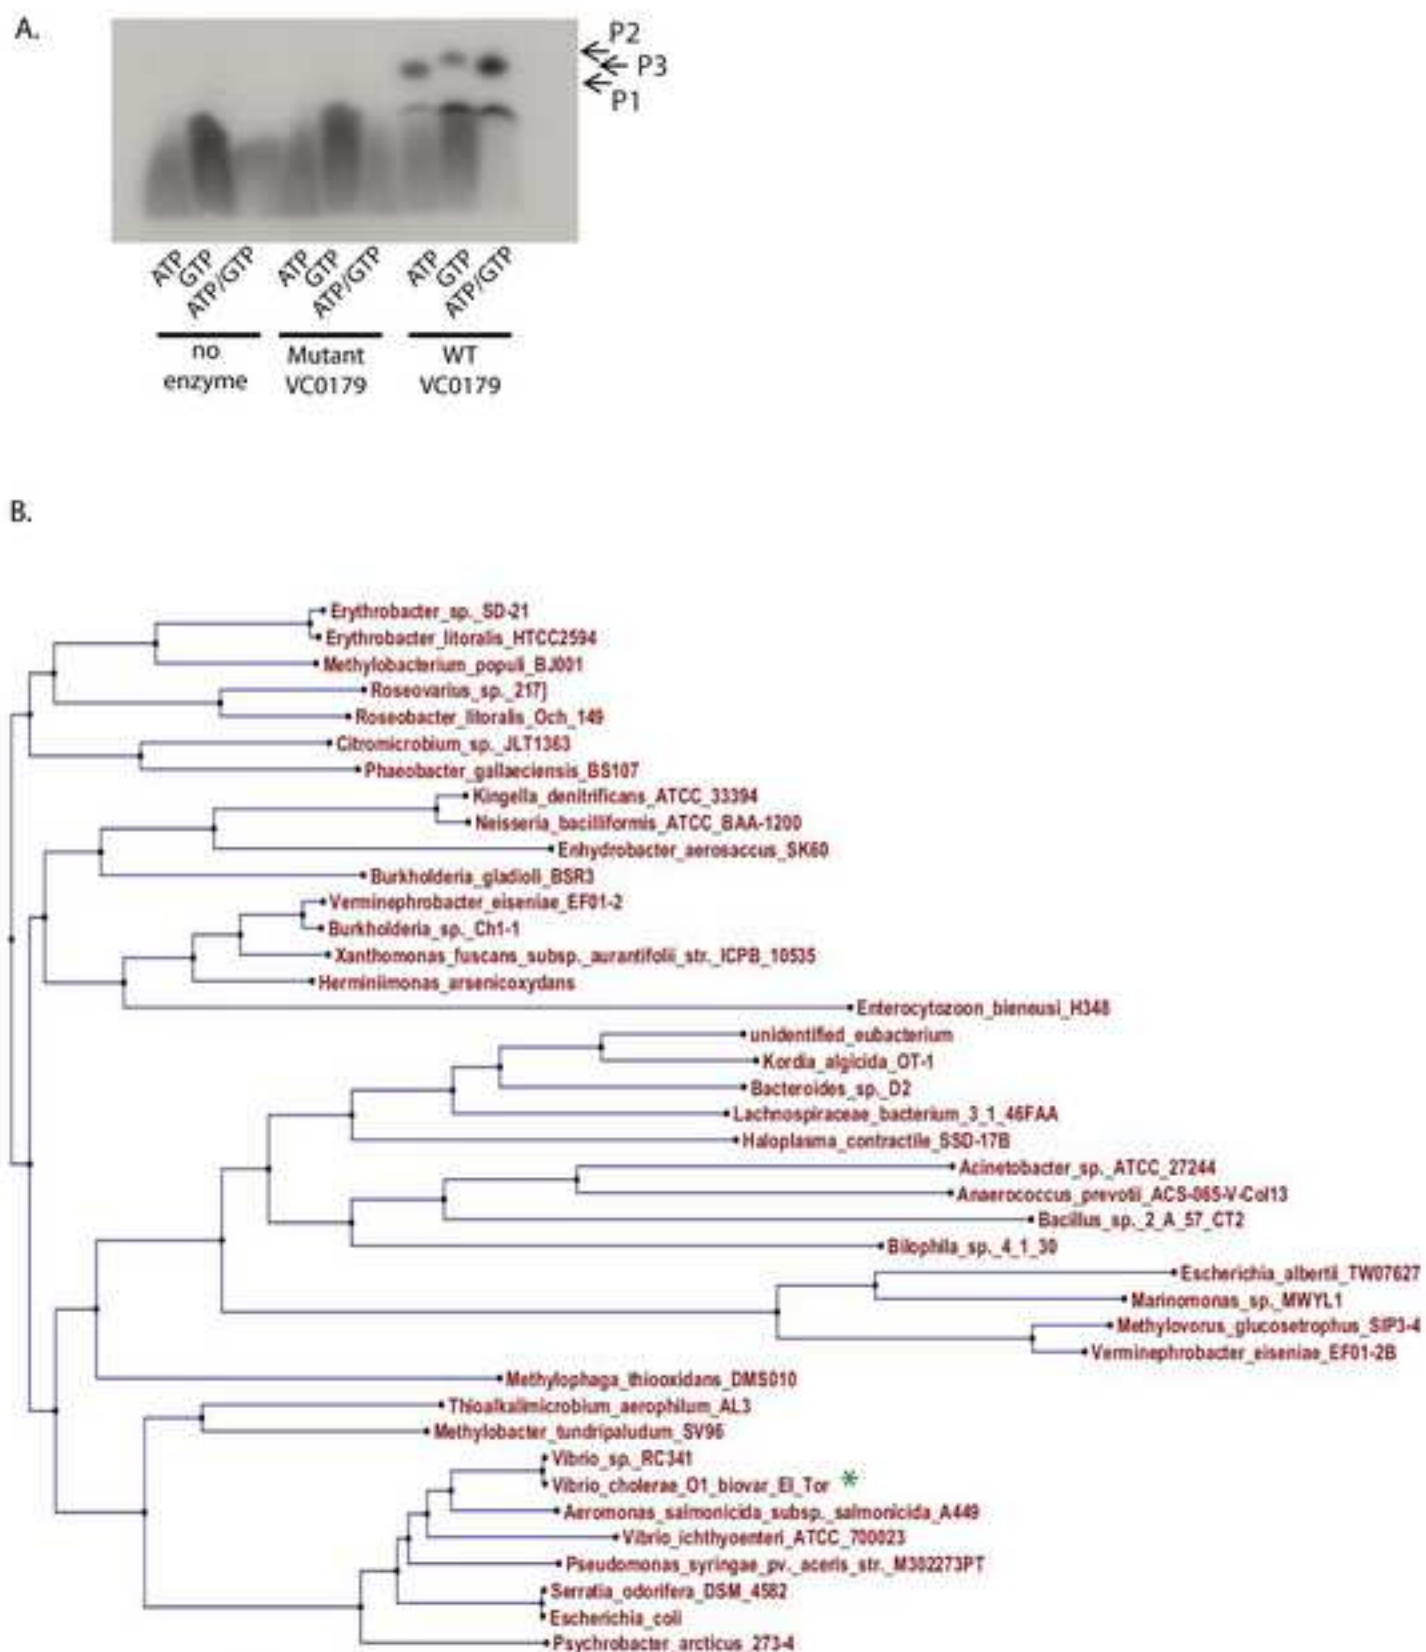

Figure S6

A.

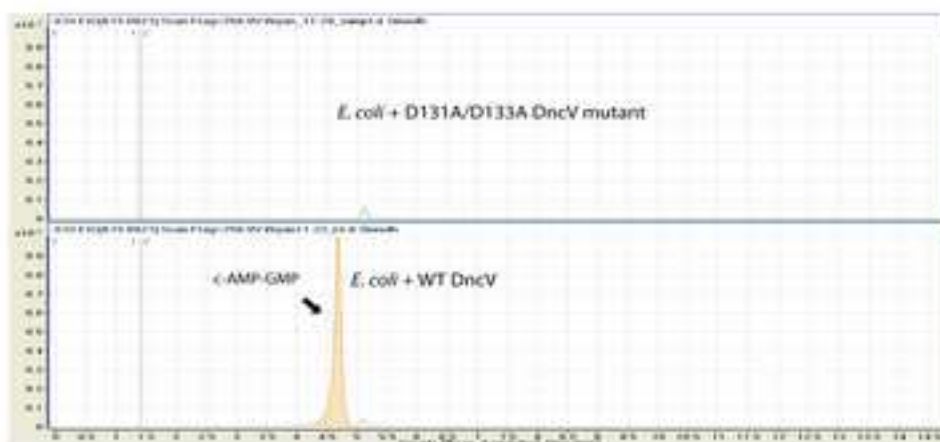

B.

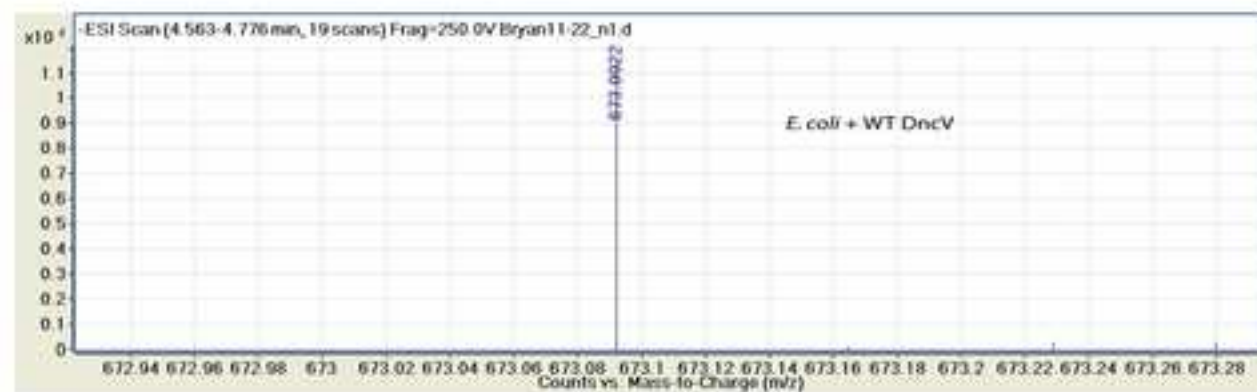

C.

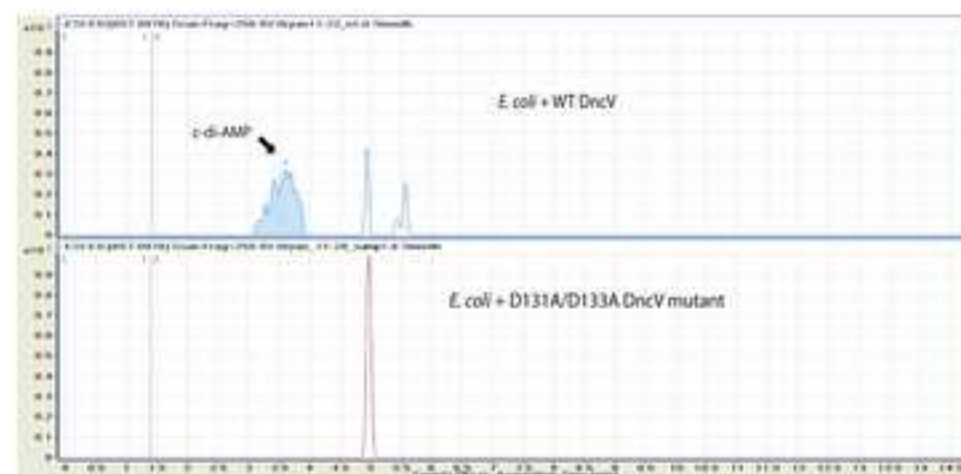

D.

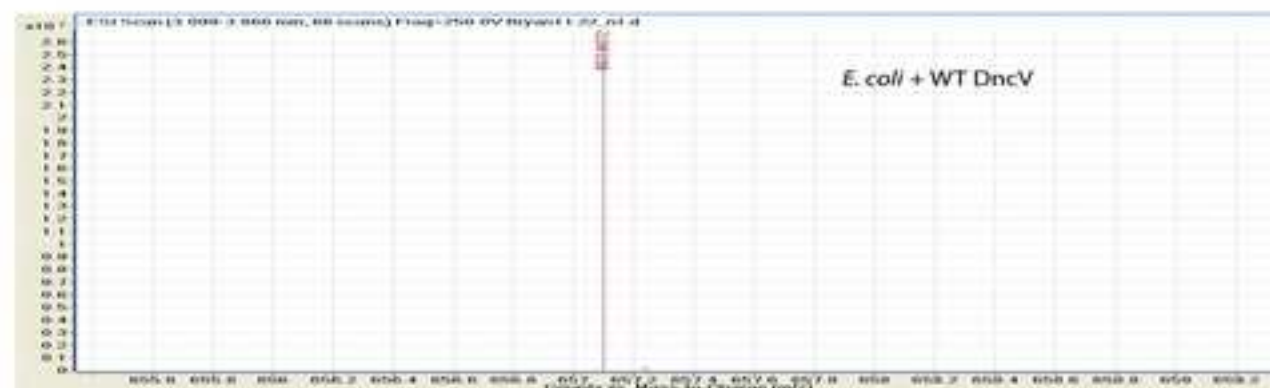

Figure S7

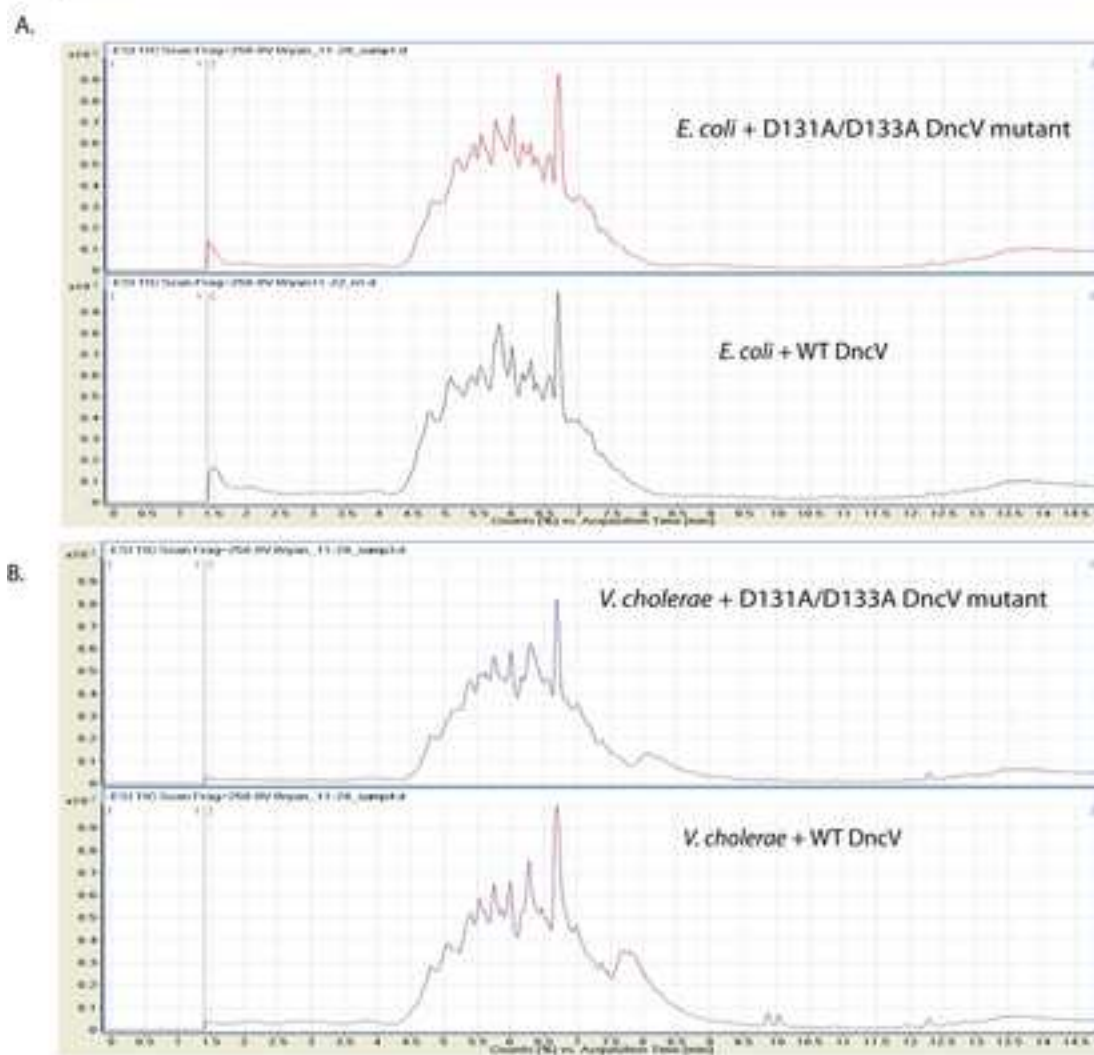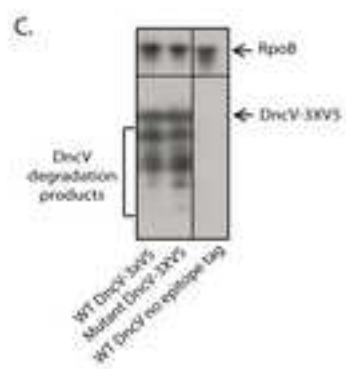

Supplement: NIHMS453758-supplement-07.pdf [file NIHMS453758-supplement-07.pdf]
